# Supplementary material
Source: publisher figshare collection journal article supplement (https://karger.figshare.com/ndownloader/files/13236653)

Fig S4 B Kaplan Meier analysis for cardiovascular mortality according to the AVR status


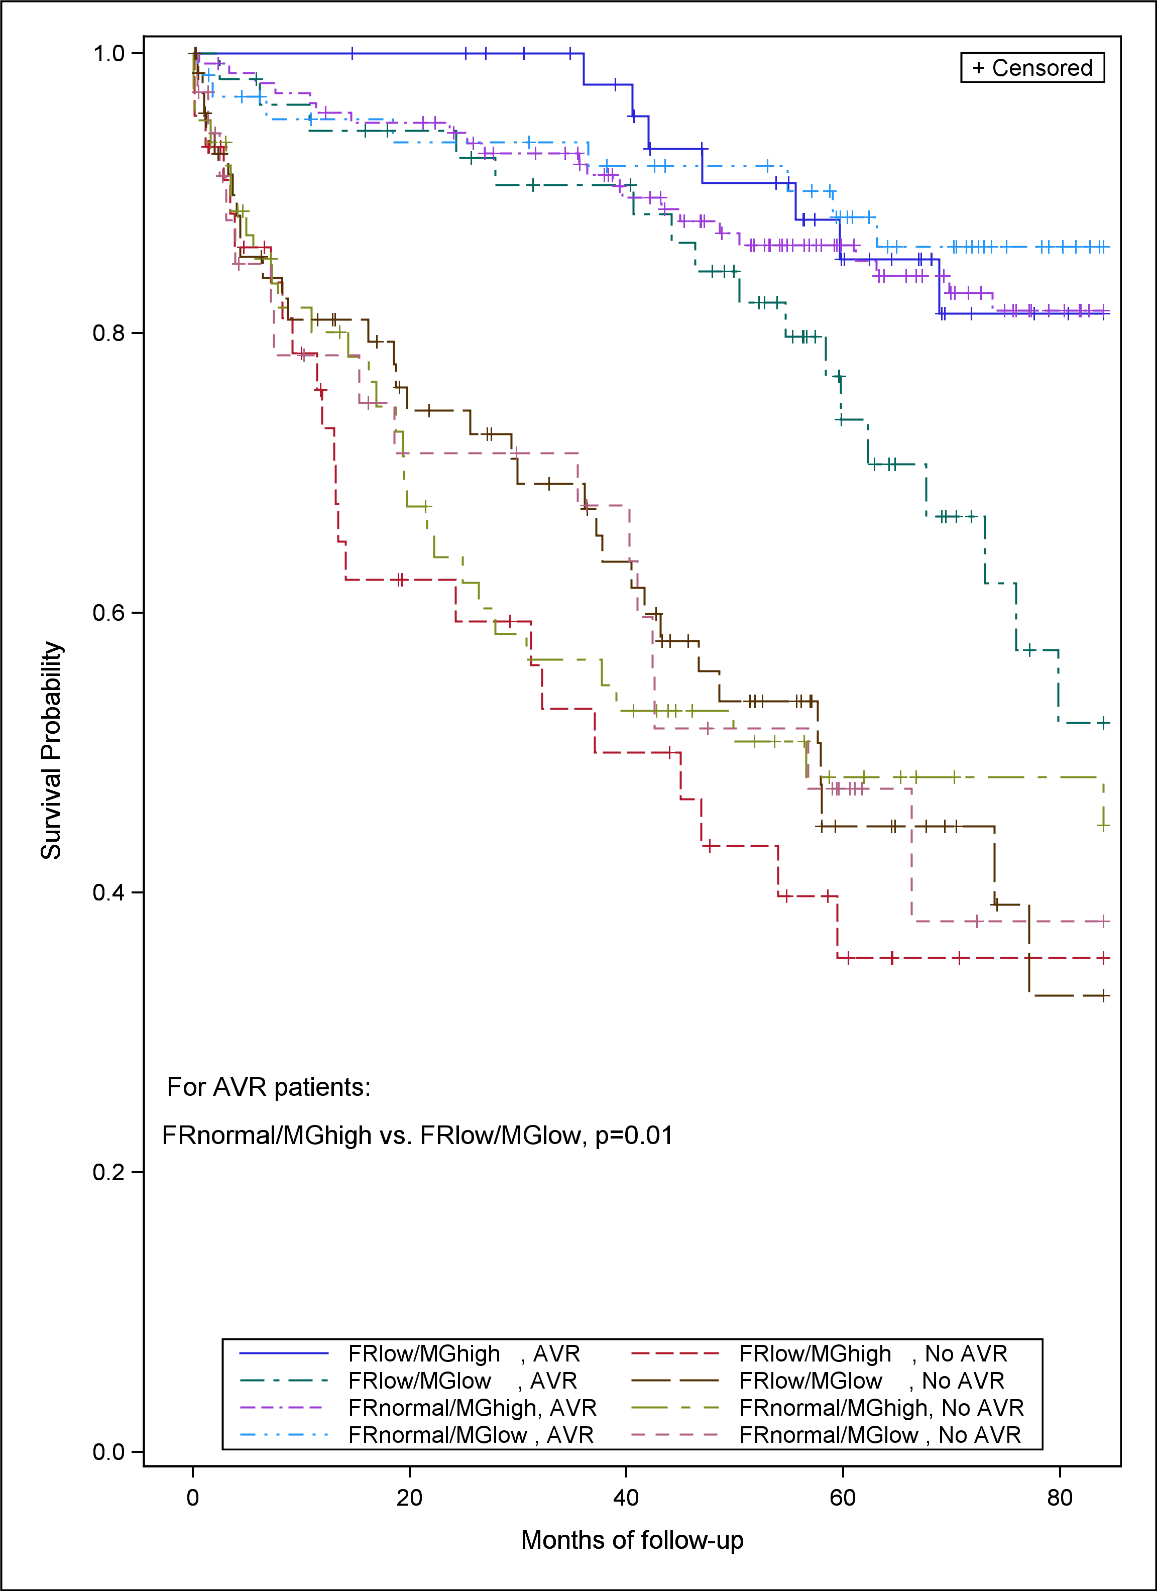

Supplement: Supplementary file 1 [file 13236653]
